# Supplementary material for: Feature tracking microfluidic analysis reveals differential roles of viscosity and friction in sickle cell blood
Source: Royal Society of Chemistry journal article supplement (doi:10.1039/d1lc01133b), 2022-01-01
Supplement: d1lc01133b2.pdf [file d1lc01133b2.pdf]

Electronic Supplementary Material (ESI) for Lab on a Chip.  
This journal is © The Royal Society of Chemistry 2022
